# Supplementary material for: Nutrition Education Seminars for Prostate Cancer—Diet and Prostate Program: Evaluation and Recommendations (DAPPER Study)
Source: Atypon-hosted journal article supplement (doi:10.3148/cjdpr-2020-028), 2020-12-15
Supplement: cjdpr-2020-028suppla.pdf [file cjdpr-2020-028suppla.pdf]

**Supplementary Table S1: Seminar content**

| Category topic                                                       | Sub-topics                                                                                                                                                                                                                                           | Time (minutes) |
|----------------------------------------------------------------------|------------------------------------------------------------------------------------------------------------------------------------------------------------------------------------------------------------------------------------------------------|----------------|
| General diet information for health and management of co-morbidities | Body changes related to prostate cancer<br>Body Mass Index (BMI), healthy weights<br>Heart disease, diabetes, osteoporosis<br>Fruits and vegetables<br>Meat, fish, poultry-protein<br>Starches and grains<br>Fats<br>Alcohol<br>Sugar<br>Plate model | 35             |
| Prostate cancer: primary and secondary prevention                    | Bone health<br>Phytonutrients and antioxidants (soy, lycopene, fibre)<br>Dietary supplements (selenium, vitamin E)                                                                                                                                   | 30             |
| Symptom management during treatment                                  | Diarrhea<br>Hot flushes                                                                                                                                                                                                                              | 10             |
| General questions                                                    |                                                                                                                                                                                                                                                      | 15             |
